# Supplementary material
Source: MDPI journal article supplement (https://www.mdpi.com/1424-8247/17/3/324)
Supplement: s1 [file s1]

## Supplementary material

**Table S1.** Ingredients composition analysis of the royal jelly (Raydel®)

| Product Name/Description         | Fresh Royal jelly              |
|----------------------------------|--------------------------------|
| Country                          | Shanghai, China                |
| Manufacturer                     | Wuxi Long life Healthcare food |
| Ingredient                       | 100% fresh royal jelly         |
| Excipient                        | None                           |
| Ingredients of Royal jelly       | Determined Amount (%)          |
| Total amount on the label        | 100                            |
| Moisture                         | 65.94                          |
| Protein                          | 14.15                          |
| Total carbohydrate               | 11.58                          |
| Fat                              | 5.23                           |
| 10-hydroxydecanoic acid (10-HAD) | 1.64                           |
| Minerals                         | 0.77                           |
| Undetermined                     | 1                              |
| Sodium (mg/100g)                 | 96                             |
| Energy (Kcal/100g)               | 162                            |
| Coliform Group bacteria (CFU/g)  | <10                            |
| Total bacteria count (CFU/g)     | <10                            |
| Chloramphenicol                  | Not detected                   |
| Nitrofurans                      | Not detected                   |
